# Supplementary material for: Function and Interaction of the Coupled Genes Responsible for Pik-h Encoded Rice Blast Resistance
Source: PubMed Central journal article supplement (PMC4045721; doi:10.1371/journal.pone.0098067), 2014-06-04
Supplement: pone.0098067.s010.pdf [file pone.0098067.s010.pdf]

**Table S1. Primers, markers and constructs used in the study**

| Primer name                   | Forward primer                             | Enzyme site      | Reverse primer                             | Enzyme site       | Use of primers                      | Resultant construct         |
|-------------------------------|--------------------------------------------|------------------|--------------------------------------------|-------------------|-------------------------------------|-----------------------------|
| <b>Gene cloning</b>           |                                            |                  |                                            |                   |                                     |                             |
| KP3                           | TTTTGGCGCGCCGAGTGTCACCAACCACAGTAATAAA      | <i>AscI</i>      | TTTTGGCGCGCCGAACAGCCTGAGGAAGCAGAACATCGTC   | <i>AscI</i>       | <i>Pikh-1</i> full-length gene      |                             |
| KP3 ORF                       | TTTTGGCGCGCCGAGTAGCACTCAACGCAAAAAGGCATCGGC | <i>AscI</i>      | TTTTGGCGCGCCGAGCGGGGACTTAGAGTATTACATGAAGGA | <i>AscI</i>       | <i>Pikh-1</i> ORF                   |                             |
| KP4                           | TTTTGGCGCGCCGCAAGATCAGTACCATCACAGTAATAGCA  | <i>AscI</i>      | TTTTGGCGCGCCAGGGACAGAATGACAGTGTAAGTGAGTTG  | <i>AscI</i>       | <i>Pikh-2</i> full-length gene      |                             |
| KP4 ORF                       | TTTGGCGCGCCAGCTGAAAGTTGCAGTGAGAAGTACAGA    | <i>AscI</i>      | TTTGGCGCGCCTCAGATGATTGGTAAGTTCTCCGATTG     | <i>AscI</i>       | <i>Pikh-2</i> ORF                   |                             |
| <b>RNAi analysis</b>          |                                            |                  |                                            |                   |                                     |                             |
| KP3i1                         | TTTACTAGTGGTACCTGGCCAGATCTCCCAATCGT        | <i>SpeI-KpnI</i> | TTGAGCTCGGATCCTGTGCCITGTGCAGGCTCAGT        | <i>SacI-BamHI</i> | <i>Pikh-1</i> RNAi                  |                             |
| KP4i                          | CACCTTGAGCTGTCCGGCAAGTT                    |                  | CAGTGACGATGCCATCAACAA                      |                   | <i>Pikh-2</i> RNAi                  |                             |
| <b>RACE</b>                   |                                            |                  |                                            |                   |                                     |                             |
| KP3-5RACE1                    | CGGCATCATCCAGGTCGTAGGACAGC                 |                  |                                            |                   | <i>Pikh-1</i> 5' RACE               |                             |
| KP3-5RACE2                    | CCATCCTTGCACGCCGATCGTCATC                  |                  |                                            |                   | <i>Pikh-1</i> 5' RACE nested primer |                             |
| KP3-3RACE1                    | CCATCGGCATCACCAACTGAAGAGC                  |                  |                                            |                   | <i>Pikh-1</i> 3' RACE               |                             |
| KP3-3RACE2                    | TGAAGAAAGAAGCCGAGGAGCATCCC                 |                  |                                            |                   | <i>Pikh-1</i> 3' RACE nested primer |                             |
| KP4-5RACE1                    | CGATCTGCGATCTGTTGTGCCCGTAC                 |                  |                                            |                   | <i>Pikh-2</i> 5' RACE               |                             |
| KP4-5RACE2                    | GAATCCTGAGGGAGCGGTGGGCAAA                  |                  |                                            |                   | <i>Pikh-2</i> 5' RACE nested primer |                             |
| KP4-3 RACE1                   | TCGCCCTGAGCTGTCTGGCAAGTTGGA                |                  |                                            |                   | <i>Pikh-2</i> 3' RACE               |                             |
| KP4-3 RACE2                   | AGTACCCAAGTGGATCACAGCATCAC                 |                  |                                            |                   | <i>Pikh-2</i> 3' RACE nested primer |                             |
| <b>Expression analysis</b>    |                                            |                  |                                            |                   |                                     |                             |
| RRT5                          | GAAGCTCTGATCAACGGTATTCC                    |                  | TCTTTGATCATCTTCGGGATACG                    |                   | <i>Pikh-1</i>                       |                             |
| RRT17                         | TGAACTTCCACGATTGGATCCAC                    |                  | ACATGGTTCTTGAATACATCATGTG                  |                   | <i>Pikh-2</i>                       |                             |
| <i>Actin</i>                  | GAGACATTCAGCGTTCCAGC                       |                  | GTATGTCGTCTCGTGGATGC                       |                   | Internal reference                  |                             |
| <i>PBZ1</i>                   | GCCGCAAGTCATGCTCTAAAG                      |                  | GCCGTCCTCGAGCTCGTA                         |                   | Internal reference                  |                             |
| <b>Transgenic plant test</b>  |                                            |                  |                                            |                   |                                     |                             |
| Gus-linker                    | CATGAAGATGCGGACTTACG                       |                  | ATCCACGCCGATTTCGG                          |                   |                                     |                             |
| <i>Hpt</i>                    | CCGCGCGGATCCGGGTGCCTAATGAGTGAGC            |                  | TCCGGATGCCTCCGCTCGAAGTA                    |                   |                                     |                             |
| <b>Yeast two-hybrid assay</b> |                                            |                  |                                            |                   |                                     |                             |
| Y2H-kh1                       | TTGGCGCGCCATGGAGGCGGCTGCCATGGCCGT          | <i>AscI</i>      | TTGGCGCGCGCTAGTAGTTTCTGTTGAATTTCA          | <i>AscI</i>       | <i>Pikh-1</i> CDS                   | BD/ AD-kh1                  |
| Y2H-kh2                       | TTGGCGCGCCATGGAGTTGGTGGTAGTGTCTC           | <i>AscI</i>      | TTGGCGCGCCTGCAGTGACGATGCCATCAACAAAT        | <i>AscI</i>       | <i>Pikh-2</i> CDS                   | BD/AD-kh2                   |
| Y2H-kh1 <sub>CC</sub>         | TTGGCGCGCCATGGAGGCGGCTGCCATGGCCGT          | <i>AscI</i>      | TTGGCGCGCCTTACATCTTCTTTGCTGGCTG            | <i>AscI</i>       | <i>Pikh-1</i> CC domain             | BD/AD-kh1 <sub>CC</sub>     |
| Y2H-kh1 <sub>NBS</sub>        | TTGGCGCGCCGAGACGACGCCGATGCTTGC             | <i>AscI</i>      | TTGGCGCGCCTGGGGAGGATGCACTAGTACT            | <i>AscI</i>       | <i>Pikh-1</i> NBS domain            | BD/AD-kh1 <sub>NBS</sub>    |
| Y2H-kh1 <sub>LRR</sub>        | TTGGCGCGCCAGGTTGATTCGCCGGCTGTCTC           | <i>AscI</i>      | TTGGCGCGCCGGCGCTGATGCCAGGGGCGTCCG          | <i>AscI</i>       | <i>Pikh-1</i> LRR domain            | BD/AD-kh1 <sub>LRR</sub>    |
| Y2H-kh1 <sub>NBLRR</sub>      | TTGGCGCGCCGAGACGACGCCGATGCTTGC             | <i>AscI</i>      | TTGGCGCGCGCTAGTAGTTTCTGTTGAATTTCA          | <i>AscI</i>       | <i>Pikh-1</i> NBLRR domain          | BD/AD-kh1 <sub>NBLRR</sub>  |
| Y2H-k1 <sub>RATX1</sub>       | TTGGCGCGCCATGAAAATCGTGTTCAGATTCCCA         | <i>AscI</i>      | TTGGCGCGCCTCAATCTTCTTTACTTGGCTGAC          | <i>AscI</i>       | <i>Pik-1</i> RATX1 domain           | BD/ AD-k1 <sub>RATX1</sub>  |
| Y2H-Ks1 <sub>RATX1</sub>      | TTGGCGCGCCATGAAAATCGTGTTCAGATTCCCA         | <i>AscI</i>      | TTGGCGCGCCTCAATCTTCTTTACTTGGCTGAC          | <i>AscI</i>       | <i>Piks-1</i> RATX1 domain          | BD/ AD-ks1 <sub>RATX1</sub> |
| Y2H-km1 <sub>RATX1</sub>      | TTGGCGCGCCATGAAAATCGTGTTCAGATTCCCA         | <i>AscI</i>      | TTGGCGCGCCTCAATCTTCTTTGCTTGGCTGA           | <i>AscI</i>       | <i>Pikm-1</i> RATX1 domain          | BD/ AD-km1 <sub>RATX1</sub> |
| Y2H-kp1 <sub>RATX1</sub>      | TTGGCGCGCCATGAAAATCGTGTTCAGATTGGCC         | <i>AscI</i>      | TTGGCGCGCCTCAATCTTATTTGCTTGGCTGACC         | <i>AscI</i>       | <i>Pikp-1</i> RATX1 domain          | BD/ AD-kp1 <sub>RATX1</sub> |
| Y2H-kh1 <sub>RATX1</sub>      | TTGGCGCGCCATGAAAATCGTGTTCAGATTGGCC         | <i>AscI</i>      | TTGGCGCGCCTCAATCTTCTTTGCTTGGCTGAC          | <i>AscI</i>       | <i>Pikh-1</i> RATX1 domain          | BD/ AD-kh1 <sub>RATX1</sub> |
| Y2H-kh2 <sub>CC</sub>         | TTGGCGCGCCATGGAGTTGGTGGTAGTGTCTC           | <i>AscI</i>      | TTGGCGCGCCCCACAGGCTCCTTTATACCAATG          | <i>AscI</i>       | <i>Pikh-2</i> CC domain             | BD/AD-kh2 <sub>CC</sub>     |
| Y2H-kh2 <sub>NBS</sub>        | TTGGCGCGCCATGGAGTTGGTGGTAGTGTCTC           | <i>AscI</i>      | TTGGCGCGCCTTTGTTGAATCTCCACGATT             | <i>AscI</i>       | <i>Pikh-2</i> NBS domain            | BD/AD-kh2 <sub>NBS</sub>    |
| Y2H-kh2 <sub>LRR</sub>        | TTGGCGCGCCTGAACTTGGCTCAAGTGAGATCAC         | <i>AscI</i>      | TTGGCGCGCCTGCAGTGACGATGCCATCAACAAAT        | <i>AscI</i>       | <i>Pikh-2</i> LRR domain            | BD /AD-kh2 <sub>LRR</sub>   |
| Y2H-kh2 <sub>NBLRR</sub>      | TCCCCCGGGTATGAAGACGGTCAATGGAGGAGC          | <i>AscI</i>      | TTGGCGCGCCTGCAGTGACGATGCCATCAACAAAT        | <i>AscI</i>       | <i>Pikh-2</i> NBLRR domain          | BD/AD-kh2 <sub>NBLRR</sub>  |
| Y2H-Ak                        | TTGGCGCGCCATGCGTGTACCACCTTTTA              | <i>AscI</i>      | TTGGCGCGCAAAGCCGGGCTTTTTTTCC               | <i>AscI</i>       | <i>AvrPik-h</i> CDS                 | BD/AD-Ak                    |
| Y2H-Ak <sub>22-113</sub>      | TTGGCGCGCCGAAACGGGCAACAAATA                | <i>AscI</i>      | TTGGCGCGCAAAGCCGGGCTTTTTTTCC               | <i>AscI</i>       | <i>AvrPik-h</i> truncated CDS       | BD/AD-Ak <sub>22-113</sub>  |

|                           |                                         |              |                                            |              |                                                |                             |
|---------------------------|-----------------------------------------|--------------|--------------------------------------------|--------------|------------------------------------------------|-----------------------------|
| Y2H-Ak <sup>S3-113</sup>  | TTGGCGCGCCAATGTTTTGGTTTATG              | <i>AscI</i>  | TTGGCGCGCCAAAGCCGGGCTTTTTTCC               | <i>AscI</i>  | <i>AvrPik-h</i> truncated CDS                  | BD/AD-Ak <sup>S3-113</sup>  |
| Y2H-Ak <sup>1-107</sup>   | TTGGCGCGCCATGCGTGTACCACCTTTTA           | <i>AscI</i>  | TTGGCGCGCCCCAAAACAATCCAACCTG               | <i>AscI</i>  | <i>AvrPik-h</i> truncated CDS                  | BD/AD-Ak <sup>1-107</sup>   |
|                           |                                         |              |                                            |              | <b>Pull-down assay</b>                         |                             |
| Pd-kh1                    | TTGGCGCGCCATGGAGGCGGCTGCCATGGCCGT       | <i>AscI</i>  | TTGGCGCGCGCTAGTAGTTTCTGTTTGAATTTCA         | <i>AscI</i>  | <i>Pikh-1</i> CDS                              | kh1-Flag                    |
| Pd-kh1 <sup>CC</sup>      | TTGGCGCGCCATGGAGGCGGCTGCCATGGCCGT       | <i>AscI</i>  | TTGGCGCGCCTCACATCTTTCTTTGCTTGGCTG          | <i>AscI</i>  | <i>Pikh-1</i> CC domain                        | kh1 <sup>CC</sup> -Flag     |
| Pd-kh2 <sup>CC</sup>      | TTGGCGCGCCATGGAGTTGGTGGTAGGTGCTTC       | <i>AscI</i>  | TTGGCGCGCCTACCCACAGGCTCCTTTATACCAATG       | <i>AscI</i>  | <i>Pikh-2</i> CC domain                        | Kh2 <sup>CC</sup> -GST      |
| Pd-Ak                     | TTGGCGCGCCATGCGTGTACCACCTTTTA           | <i>AscI</i>  | TTGGCGCGCCTAAAAGCCGGGCTTTTTTCC             | <i>AscI</i>  | <i>AvrPik-h</i> CDS                            | Ak-GST                      |
| Pd-Ak <sup>22-113</sup>   | TTGGCGCGCCATGGAACGGGCAACAAATA           | <i>AscI</i>  | TTGGCGCGCCTAAAAGCCGGGCTTTTTTCC             | <i>AscI</i>  | <i>AvrPik-h</i> truncated CDS                  | Ak <sup>22-113</sup> -GST   |
|                           |                                         |              |                                            |              | <b>BiFC analysis</b>                           |                             |
| BiFC-kh1                  | TTGGCGCGCCATGGAGGCGGCTGCCATGGCCGT       | <i>AscI</i>  | TTGGCGCGCC T GCTAGTAGTTTCTGTTTGAATTTCA     | <i>AscI</i>  | <i>Pikh-1</i> CDS                              | YCE-kh1                     |
| BiFC-kh1 <sup>CC</sup>    | TTGGCGCGCCATGGAGGCGGCTGCCATGGCCGT       | <i>AscI</i>  | TTGGCGCGCC T CTTACATCTTTCTTTGCTTGGCTG      | <i>AscI</i>  | <i>Pikh-1</i> CC domain                        | YCE-kh1 <sup>CC</sup>       |
| BiFC-kh2 <sup>CC</sup>    | TTGGCGCGCCATGGAGTTGGTGGTAGGTGCTTC       | <i>AscI</i>  | TTGGCGCGCC T CCCCACAGGCTCCTTTATACCAATG     | <i>AscI</i>  | <i>Pikh-2</i> CC domain                        | YNE-kh2 <sup>CC</sup>       |
| BiFC-Ak                   | TTGGCGCGCCATGCGTGTACCACCTTTTA           | <i>AscI</i>  | TTGGCGCGCC T TAAAAAGCCGGGCTTTTTTCC         | <i>AscI</i>  | <i>AvrPik-h</i> CDS                            | YNE-Ak                      |
| BiFC-Ak <sup>22-113</sup> | TTGGCGCGCCATGGAACGGGCAACAAATA           | <i>AscI</i>  | TTGGCGCGCC T TAAAAAGCCGGGCTTTTTTCC         | <i>AscI</i>  | <i>AvrPik-h</i> truncated CDS                  | YNE-Ak <sup>22-113</sup>    |
| NLS- <i>Xba I</i>         | AATCTAGAATGCCT AAA AAG AAG CGT AAG GT   | <i>Xba I</i> | AATCTAGA AGAATTCACGGATCCAGGGTC             | <i>Xba I</i> | NLS                                            |                             |
| NES- <i>Xba I</i>         | ATTTCTAGAATGAATGAATTAGCCTTGAAA          | <i>Xba I</i> | ATTTCTAGATGTCTTGTGATATCAAGA                | <i>Xba I</i> | NES                                            |                             |
|                           |                                         |              |                                            |              | <b>Subcellular localization analysis</b>       |                             |
| eGFP-kh1                  | TTGGCGCGCCATGGAGGCGGCTGCCATGGCCGT       | <i>AscI</i>  | TTGGCGCGCC T GCTAGTAGTTTCTGTTTGAATTTCA     | <i>AscI</i>  | <i>Pikh-1</i> CDS                              | Pikh-1-eGFP                 |
| eGFP-kh1 <sup>CC</sup>    | TTGGCGCGCCATGGAGGCGGCTGCCATGGCCGT       | <i>AscI</i>  | TTGGCGCGCC T CTTACATCTTTCTTTGCTTGGCTG      | <i>AscI</i>  | <i>Pikh-1</i> CC domain                        | Pikh-1 <sup>CC</sup> -eGFP  |
| eGFP-kh1 <sup>NBS</sup>   | TTGGCGCGCCGAGACGACGCCGATGCTTGC          | <i>AscI</i>  | TTGGCGCGCC T TGGGGAGGATGCACTAGTACT         | <i>AscI</i>  | <i>Pikh-1</i> NBS domain                       | Pikh-1 <sup>NBS</sup> -eGFP |
| eGFP-kh1 <sup>LRR</sup>   | TTGGCGCGCCAGGTTGATTCGCGGCTGTCTC         | <i>AscI</i>  | TTGGCGCGCC T GCGCTGATGCCAGGGGCGTCCG        | <i>AscI</i>  | <i>Pikh-1</i> LRR domain                       | Pikh-1 <sup>LRR</sup> -eGFP |
| eGFP-kh2                  | TTGGCGCGCCATGGAGTTGGTGGTAGGTGCTTC       | <i>AscI</i>  | TTGGCGCGCC T TGCAGTGACGATGCCATCAACAAAT     | <i>AscI</i>  | <i>Pikh-2</i> CDS                              | Pikh-2-eGFP                 |
| eGFP-kh2 <sup>CC</sup>    | TTGGCGCGCCATGGAGTTGGTGGTAGGTGCTTC       | <i>AscI</i>  | TTGGCGCGCC T CCCCACAGGCTCCTTTATACCAATG     | <i>AscI</i>  | <i>Pikh-2</i> CC domain                        | Pikh-2 <sup>CC</sup> -eGFP  |
| eGFP-kh2 <sup>NBS</sup>   | TTGGCGCGCCATGAAGACGGTCATGGAGGAGC        | <i>AscI</i>  | TTGGCGCGCC T GCCTTTTGTGAACTTCCACGATT       | <i>AscI</i>  | <i>Pikh-2</i> NBS domain                       | Pikh-2 <sup>NBS</sup> -eGFP |
| eGFP-kh2 <sup>LRR</sup>   | TTGGCGCGCCCTGAACCTGGCTCAAGTGAGATCAC     | <i>AscI</i>  | TTGGCGCGCC T TGCAGTGACGATGCCATCAACAAAT     | <i>AscI</i>  | <i>Pikh-2</i> LRR domain                       | Pikh-2 <sup>LRR</sup> -eGFP |
| NLS- <i>NotI</i>          | AAGCGGCCGCATGCCT AAA AAG AAG CGT AAG GT | <i>NotI</i>  | AAGCGGCCGAGAATTCACGGATCCAGGGTC             | <i>NotI</i>  | NLS                                            |                             |
| NES- <i>NotI</i>          | ATTGCGGGCCATGAATGAATTAGCCTTGAAA         | <i>NotI</i>  | ATTGCGGGCCGCTGTCTTGTGATATCAAGA             | <i>NotI</i>  | NES                                            |                             |
|                           |                                         |              |                                            |              | <b>Transient overexpression in tabacco</b>     |                             |
| Te-kh1                    | TTGGCGCGCCATGGAGGCGGCTGCCATGGCCGT       | <i>AscI</i>  | TTGGCGCGCCTCAGCTAGTAGTTTCTGTTTGAATTTCA     | <i>AscI</i>  | <i>Pikh-1</i> CDS                              | 35S-kh1                     |
| Te-kh2                    | TTGGCGCGCCATGTATGGAGTTGGTGGTAGGTGCTTC   | <i>AscI</i>  | TTGGCGCGCCTCATTGCAGTGACGATGCCATCAACAAAT    | <i>AscI</i>  | <i>Pikh-2</i> CDS                              | 35S-kh2                     |
| Te-Ak                     | TTGGCGCGCCATGCGTGTACCACCTTTTA           | <i>AscI</i>  | TTGGCGCGCCTAAAAGCCGGGCTTTTTTCC             | <i>AscI</i>  | <i>AvrPik-h</i> CDS                            | 35S-Ak                      |
| Te-Ak <sup>22-113</sup>   | TTGGCGCGCCATGGAACGGGCAACAAATA           | <i>AscI</i>  | TTGGCGCGCCTAAAAGCCGGGCTTTTTTCC             | <i>AscI</i>  | <i>AvrPik-h</i> truncated CDS                  | 35S-Ak <sup>22-113</sup>    |
| Te-kh2 <sup>CC</sup>      | TTGGCGCGCCATGGAGTTGGTGGTAGGTGCTTC       | <i>AscI</i>  | TTGGCGCGCCTACCCACAGGCTCCTTTATACCAATG       | <i>AscI</i>  | <i>Pikh-2</i> CC domain                        | 35S-kh2 <sup>CC</sup>       |
| Te-kh2 <sup>NBS</sup>     | TTGGCGCGCCATGAAGACGGTCATGGAGGAGC        | <i>AscI</i>  | TTGGCGCGCCTAGCCTTTTGTGAACTTCCACGATT        | <i>AscI</i>  | <i>Pikh-2</i> NBS domain                       | 35S-kh2 <sup>NBS</sup>      |
| Te-kh2 <sup>LRR</sup>     | TTGGCGCGCCATGTGAACTGGCTCAAGTGAGATCAC    | <i>AscI</i>  | TTGGCGCGCCTCATGCAGTGACGATGCCATCAACAAAT     | <i>AscI</i>  | <i>Pikh-2</i> LRR domain                       | 35S-kh2 <sup>LRR</sup>      |
| Te-kh2 <sup>NBSLRR</sup>  | TTCCCCGGGATGTATGAAGACGGTCATGGAGGAGC     | <i>AscI</i>  | TTGGCGCGCCTCATGCAGTGACGATGCCATCAACAAAT     | <i>AscI</i>  | <i>Pikh-2</i> NBSLRR domain                    | 35S-kh2 <sup>NBSLRR</sup>   |
| NLS-T                     | TATGCCT AAA AAG AAG CGT AAG GT          | <i>Xem I</i> | ATTGGCGCGCCATGCCT AAA AAG AAG CGT AAG GT   | <i>AscI</i>  | NLS                                            | 35S-kh2-NLS                 |
| NES-T                     | TATGAATGAATTAGCCTTGAAA                  | <i>Xem I</i> | ATTGGCGCGCCCTGTCTTGTGATATCAAGA             | <i>AscI</i>  | NES                                            | 35S-kh2-NES                 |
| kh2-prom                  | CGCGGATCCCGATGCCCTTTTGGCTTGGAGTG        | <i>BamHI</i> | CGCGGATCC GGCGCGCC CTTGTTCTCTGTACTTCTACTGC | <i>BamHI</i> | <i>Pikh-2</i> promoter                         |                             |
| HA-kh2                    | AACCCGGGATGTACCCATACGATGTCCAGATT        | <i>Sma I</i> | AACCCGGGTGCAGTGACGATGCCATCAACAAAT          | <i>Sma I</i> | HA- <i>Pikh-2</i>                              | NP-kh2                      |
|                           |                                         |              |                                            |              | <b>Transient expression in rice protoplast</b> |                             |
| kh1-prom                  | CGCGGATCCCTTGTCTCTGTACTTCTACTGC         | <i>BamHI</i> | CGCGGATCC GGCGCGCC CGATGCCCTTTTGGCTTGGAGTG | <i>BamHI</i> | <i>Pikh-1</i> promoter                         |                             |
| kh2-prom                  | CGCGGATCCCGATGCCCTTTTGGCTTGGAGTG        | <i>BamHI</i> | CGCGGATCC GGCGCGCC CTTGTTCTCTGTACTTCTACTGC | <i>BamHI</i> | <i>Pikh-2</i> promoter                         |                             |
| Luc-kh1                   | TTGGCGCGCCATGGAGGCGGCTGCCATGGCCGT       | <i>AscI</i>  | TTGGCGCGCCTCAGCTAGTAGTTTCTGTTTGAATTTCA     | <i>AscI</i>  | <i>Pikh-1</i> CDS                              | Luc-kh1                     |
| Luc-kh1 <sup>CC</sup>     | TTGGCGCGCCATGGAGGCGGCTGCCATGGCCGT       | <i>AscI</i>  | TTGGCGCGCCTCACATCTTTCTTTGCTTGGCTG          | <i>AscI</i>  | <i>Pikh-1</i> CC domain                        | Luc-kh1 <sup>CC</sup>       |

|                          |                                        |             |                                         |             |                               |                           |
|--------------------------|----------------------------------------|-------------|-----------------------------------------|-------------|-------------------------------|---------------------------|
| Luc-kh1 <sub>NBS</sub>   | TTGGCGCGCCATGGAGACGACCCGATGCTTGC       | <i>AseI</i> | TTGGCGCGCCTCATGGGGAGGATGCACTAGTACT      | <i>AseI</i> | <i>Pikh-1</i> NBS domain      | Luc- kh1 <sub>NBS</sub>   |
| Luc-kh1 <sub>LRR</sub>   | TTGGCGCGCCATGAGGTGATTGCGCCGGCTGTCTC    | <i>AseI</i> | TTGGCGCGCCTCAGGCGTGATGCCAGGGGCGTCGC     | <i>AseI</i> | <i>Pikh-1</i> LRR domain      | Luc-kh1 <sub>LRR</sub>    |
| Luc-kh2                  | TTGGCGCGCCATGTATGGAGTTGGTGGTAGGTGCTTC  | <i>AseI</i> | TTGGCGCGCCTCATTGCAGTGACGATGCCATCAACAAAT | <i>AseI</i> | <i>Pikh-2</i> CDS             | Luc-kh2                   |
| Luc-kh2 <sub>CC</sub>    | TTGGCGCGCCATGGAGTTGGTGGTAGGTGCTTC      | <i>AseI</i> | TTGGCGCGCCTCACCCACAGGCTCCTTTATACCAATG   | <i>AseI</i> | <i>Pikh-2</i> CC domain       | Luc-kh2 <sub>CC</sub>     |
| Luc-kh2 <sub>NBS</sub>   | TTGGCGCGCCATGAAGACGGTCATGGAGGAGC       | <i>AseI</i> | TTGGCGCGCCTCAGCCTTTTGTGAACTTCCACGATT    | <i>AseI</i> | <i>Pikh-2</i> NBS domain      | Luc-kh2 <sub>NBS</sub>    |
| Luc-kh2 <sub>LRR</sub>   | TTGGCGCGCCATGCTGAACTTGGCTCAAGTGAGATCAC | <i>AseI</i> | TTGGCGCGCCTCATGCAGTGACGATGCCATCAACAAAT  | <i>AseI</i> | <i>Pikh-2</i> LRR domain      | Luc-kh2 <sub>LRR</sub>    |
| Luc-Ak                   | TTGGCGCGCCATGCGTGTACCCTTTTA            | <i>AseI</i> | TTGGCGCGCCTTAAAAGCCGGGCCTTTTTTTCC       | <i>AseI</i> | <i>AvrPik-h</i> CDS           | Ubi- Ak                   |
| Luc-Ak <sub>22-113</sub> | TTGGCGCGCCGAAACGGGAACAAATA             | <i>AseI</i> | TTGGCGCGCCTTAAAAGCCGGGCCTTTTTTTCC       | <i>AseI</i> | <i>AvrPik-h</i> truncated CDS | Ubi- Ak <sub>22-113</sub> |
| FLAG-Nos                 | AACCCGGGATGGATTACAAGGATGATGATGATA      | <i>SmaI</i> | AACCCGGG CGATCTAGTAACATAGATGA           | <i>SmaI</i> | FLAG-tagged fragments         |                           |
| HA-Nos                   | AACCCGGG ATGTACCCATACGATGTTCCAGATT     | <i>SmaI</i> | AACCCGGG CGATCTAGTAACATAGATGA           | <i>SmaI</i> | HA-tagged fragments           |                           |
